# Supplementary material for: Characterization of plastid psbT sense and antisense RNAs
Source: PubMed Central journal article supplement — Nucleic Acids Res. 2011 Mar 17;39(13):5379–87. doi: 10.1093/nar/gkr143 (PMC3141253; doi:10.1093/nar/gkr143), 2011-03-17
Supplement: supp_gkr143_Supplementary_Figure_1.pdf [file supp_gkr143_Supplementary_Figure_1.pdf]

**Suppl. Figure 1.** Secondary structure of the *PpsbT* initiated mRNA. Translations start and stop codons are boxed. PE (154) represents the 5' ends of processing products as determined previously by primer extension (10). The arrow indicates the first nucleotide of the primary transcript as revealed by 5'RACE. The cleavage site that is marked by a scissor corresponds to the (a) product of the primer extension reaction of Figure 3. The structure was obtained using the programme rnafold (<http://bioweb2.pasteur.fr>).
